# Supplementary material for: Heterogeneous nucleation of polyethylene crystals on binary hexagonal nanoplatelets
Source: Springer Nature journal article supplement (doi:10.1007/s10853-024-09683-5), 2024-05-01
Supplement: MOESM1 [file 27109914]

# Heterogeneous Nucleation of Polyethylene Crystals on Binary Hexagonal Nanoplatelets

Nathan W. Volchko and Gregory C. Rutledge

Additional crystallization curves for samples not included in the text, obtained from differential scanning calorimetry.

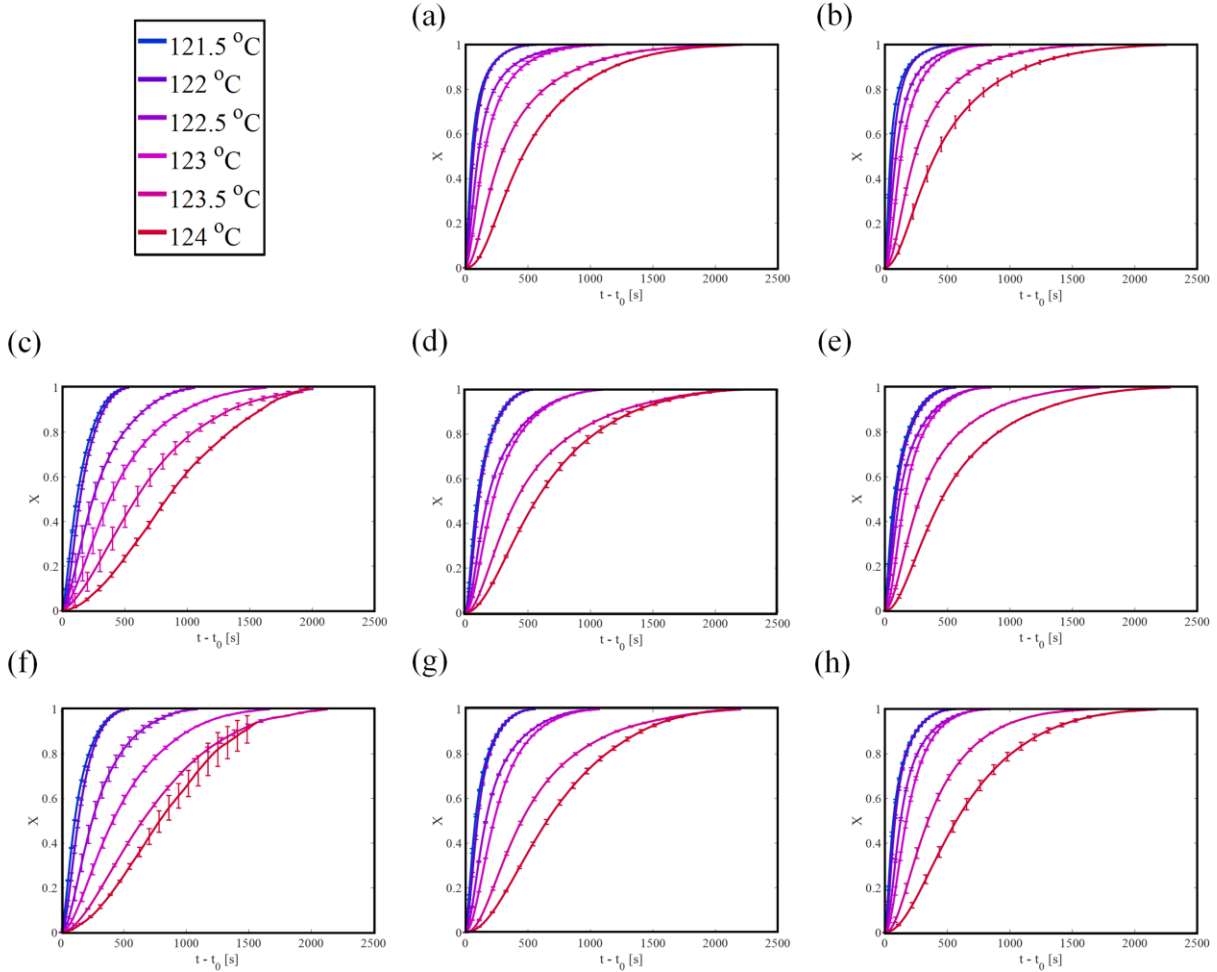

**Fig. S1** Evolution of crystallinity. The curves denote the averages of two replicates, and the error bars denote the high and low values of the replicates at evenly dispersed intervals. (a) hBN-2%, (b) hBN-5%, (c) MoS<sub>2</sub>-0.5%, (d) MoS<sub>2</sub>-2%, (e) MoS<sub>2</sub>-5%, (f) WS<sub>2</sub>-0.5%, (g) WS<sub>2</sub>-2%, (h) WS<sub>2</sub>-5%.
